# Supplementary material
Source: PubMed Central journal article supplement (PMC8307563)
Supplement: pnas.2018799118.sapp.pdf [file pnas.2018799118.sapp.pdf]

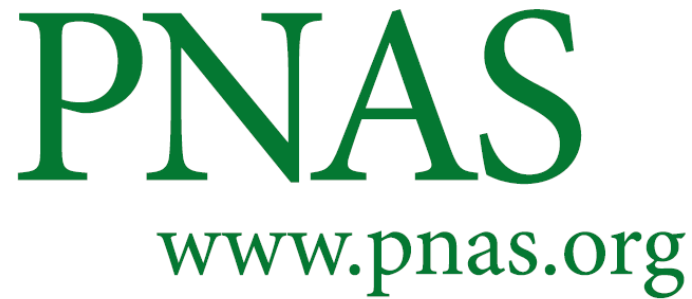

Supplementary Information for

***OsPDCD5* negatively regulates plant architecture and grain yield in rice**

Shiqing Dong<sup>1†</sup>, Xianxin Dong<sup>1,5†</sup>, Xiaokang Han<sup>1</sup>, Fan Zhang<sup>6</sup>, Yu Zhu<sup>1</sup>, Xiaoyun Xin<sup>1</sup>, Ying Wang<sup>1</sup>, Yuanyi Hu<sup>2</sup>, Dingyang Yuan<sup>2</sup>, Jianping Wang<sup>3</sup>, Zhou Huang<sup>3</sup>, Fuan Niu<sup>4</sup>, Zejun Hu<sup>4</sup>, Peiwen Yan<sup>1</sup>, Liming Cao<sup>4</sup>, Haohua He<sup>3</sup>, Junru Fu<sup>3</sup>, Yeyun Xin<sup>2</sup>, Yanning Tan<sup>2</sup>, Bigang Mao<sup>2</sup>, Bingran Zhao<sup>2\*</sup>, Jinshui Yang<sup>1\*</sup>, Longping Yuan<sup>2\*</sup>, Xiaojin Luo<sup>1,3\*</sup>

Xiaojin Luo<sup>1,3\*</sup>, Longping Yuan<sup>2\*</sup>, Jinshui Yang<sup>1\*</sup>, Bingran Zhao<sup>2\*</sup>  
Email: luoxj@fudan.edu.cn, lpyuan@hhrc.ac.cn, jsyang@fudan.edu.cn and  
brzhao652@hhrc.ac.cn.

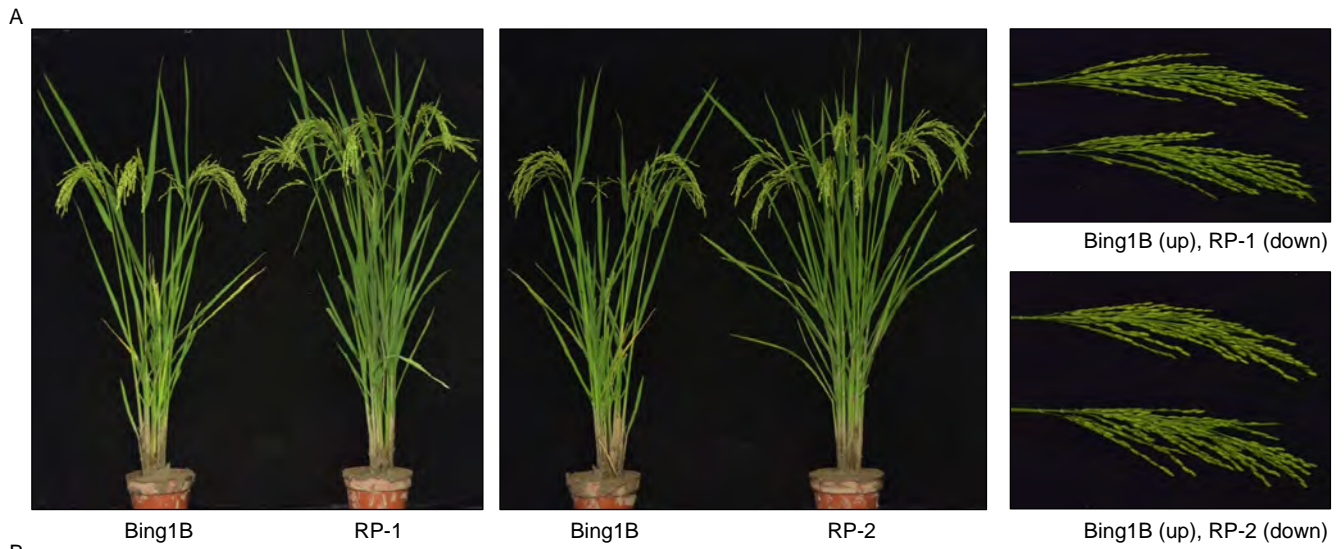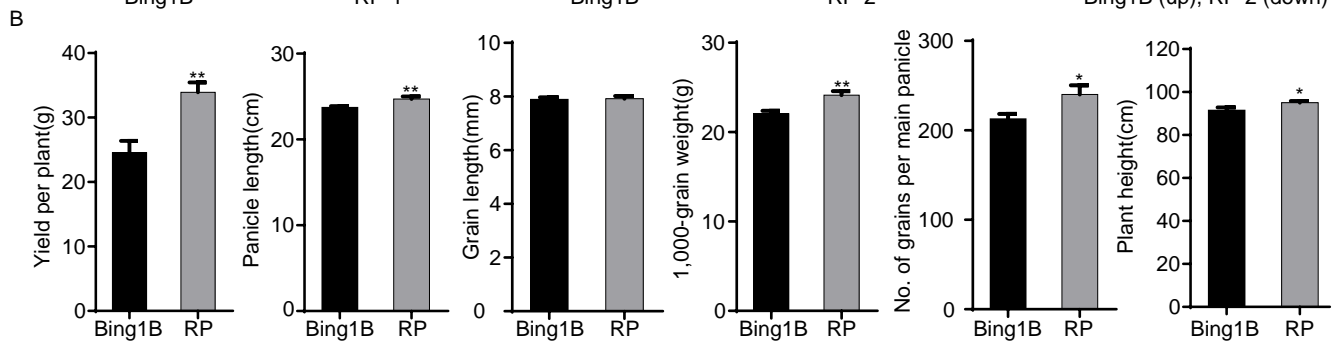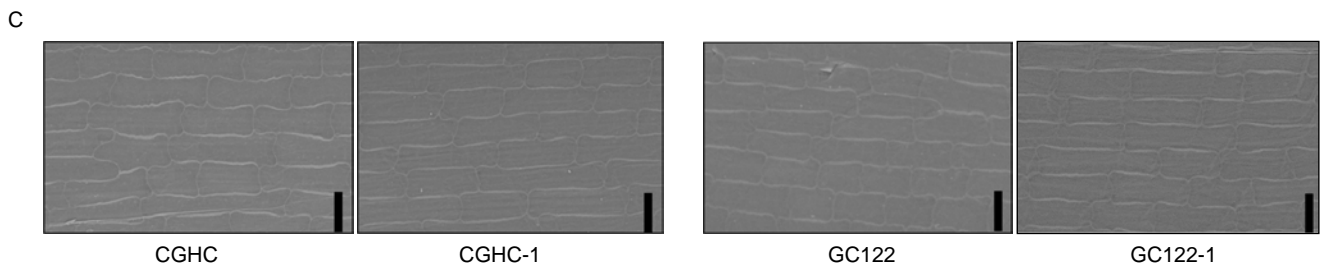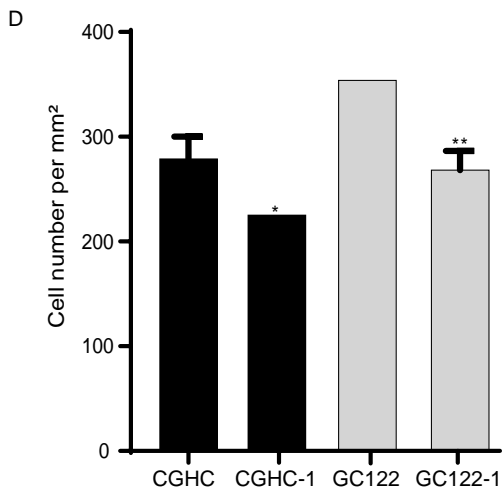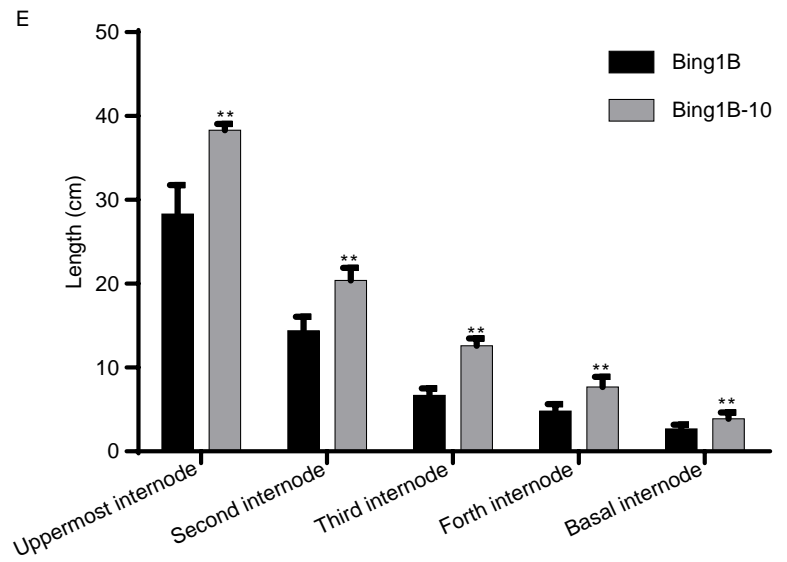

F

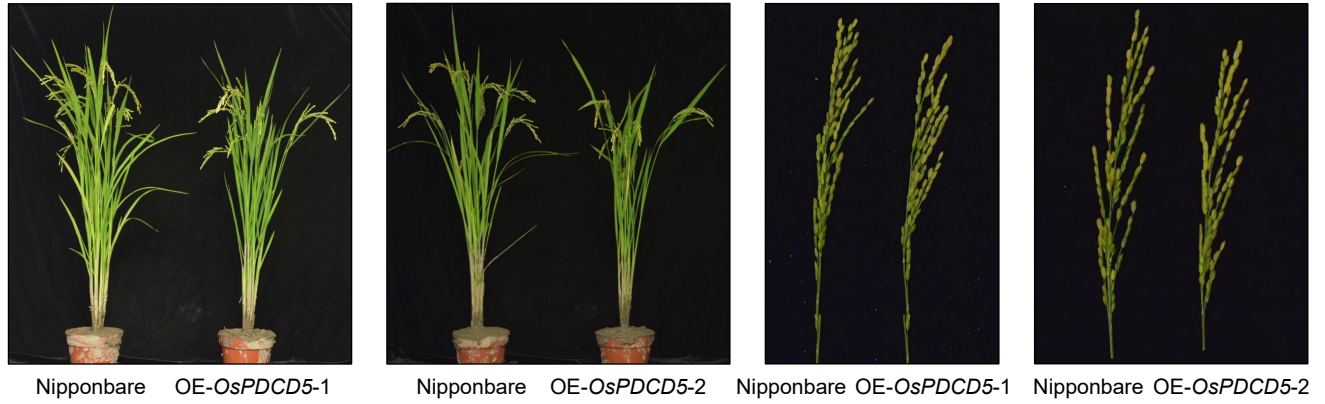

G

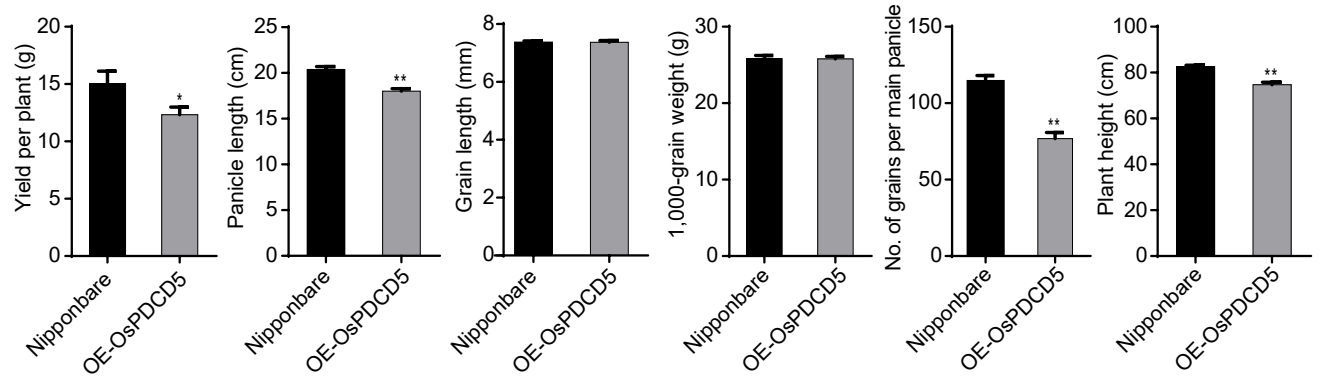

H

Target site on *OsPDCD5*

5' ...ACCCAGAGTTGGAAGCTATCAGGCAGAGG... 3' T025  
 5' ...ACCCAGAGTTGGAA - - - TCAGGCAGAGG... 3' T025-7

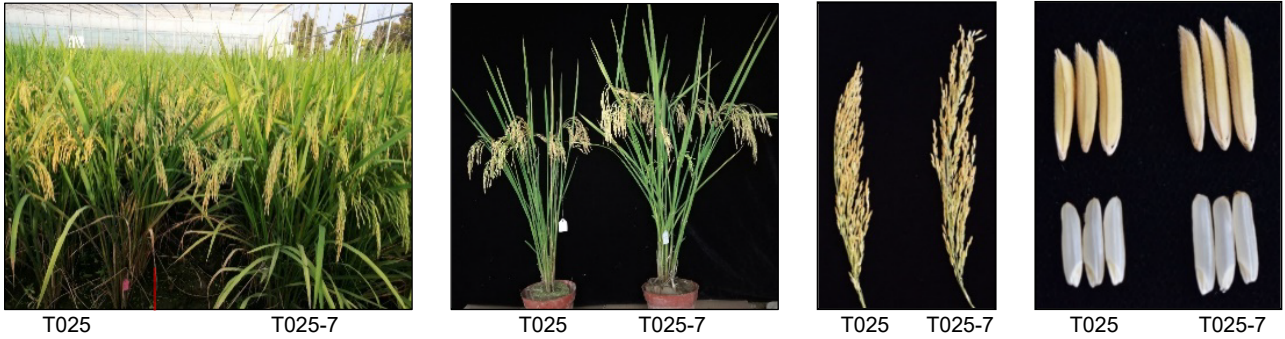

Target site on *OsPDCD5*

5' ...ACCCAGAGTTGGAAGCTATCAGGCAGAGG... 3' CGHC  
 5' ...ACCCAGAGTTGGAAGCTATCAGGC - GAGG... 3' CGHC-2

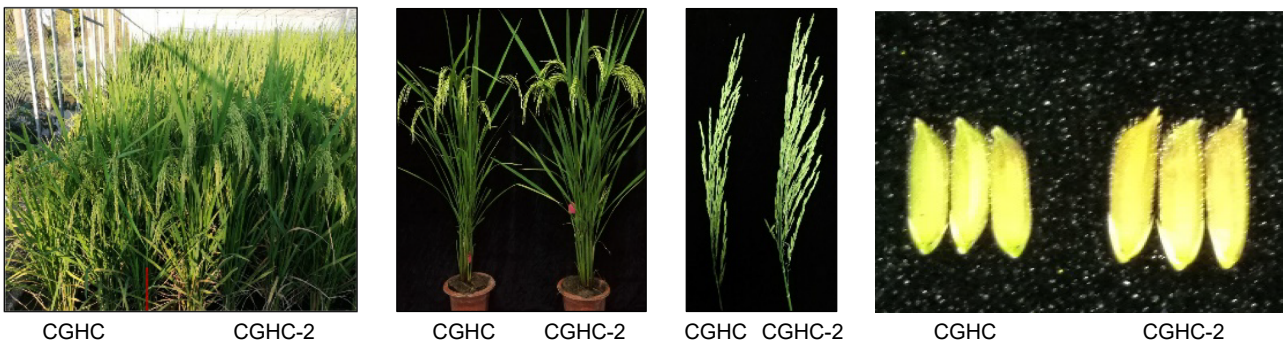

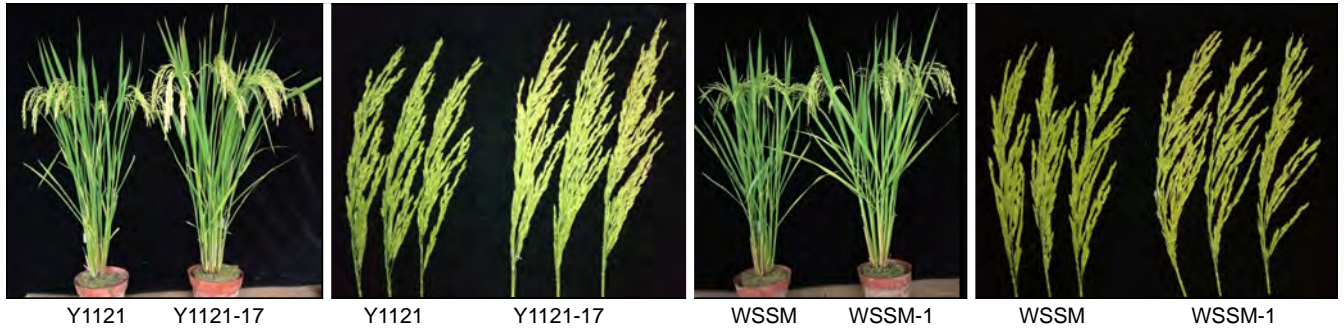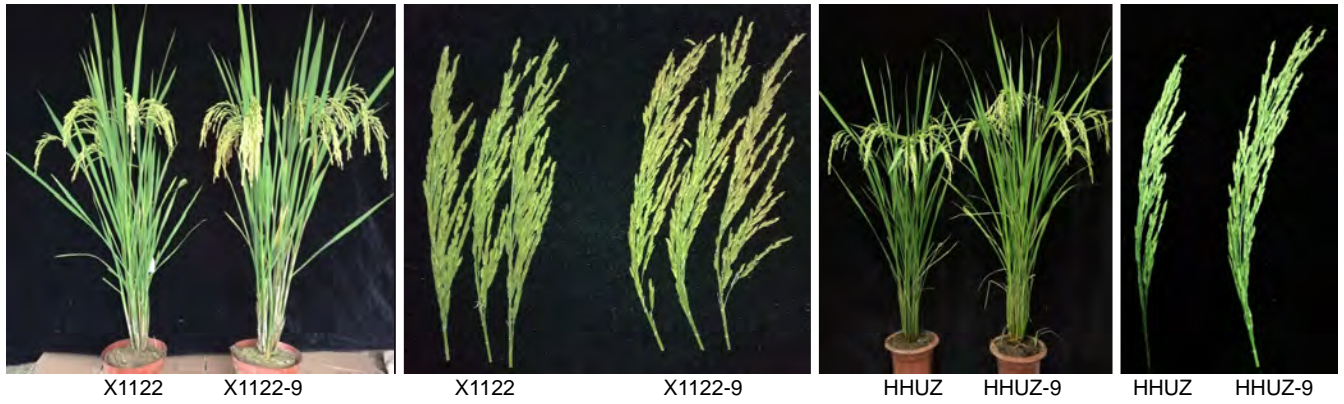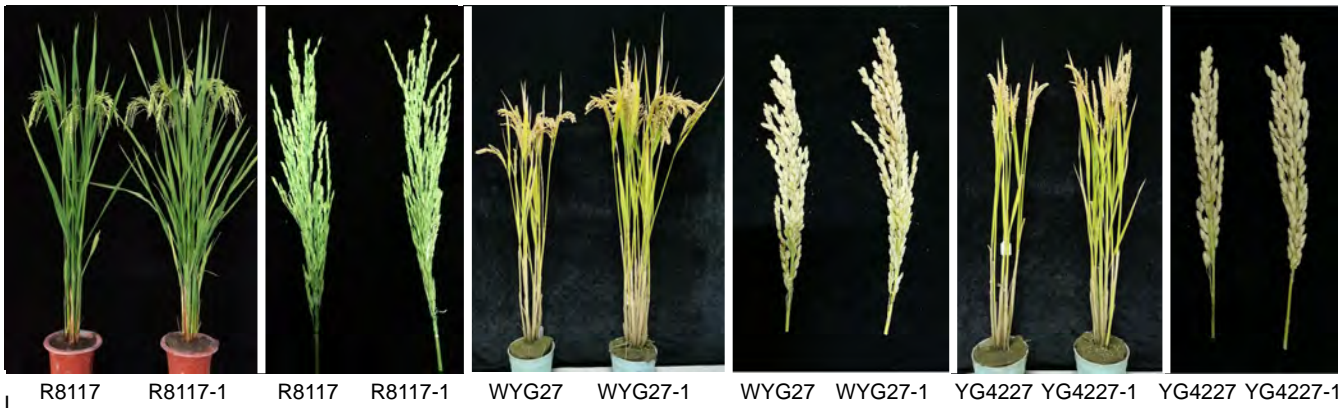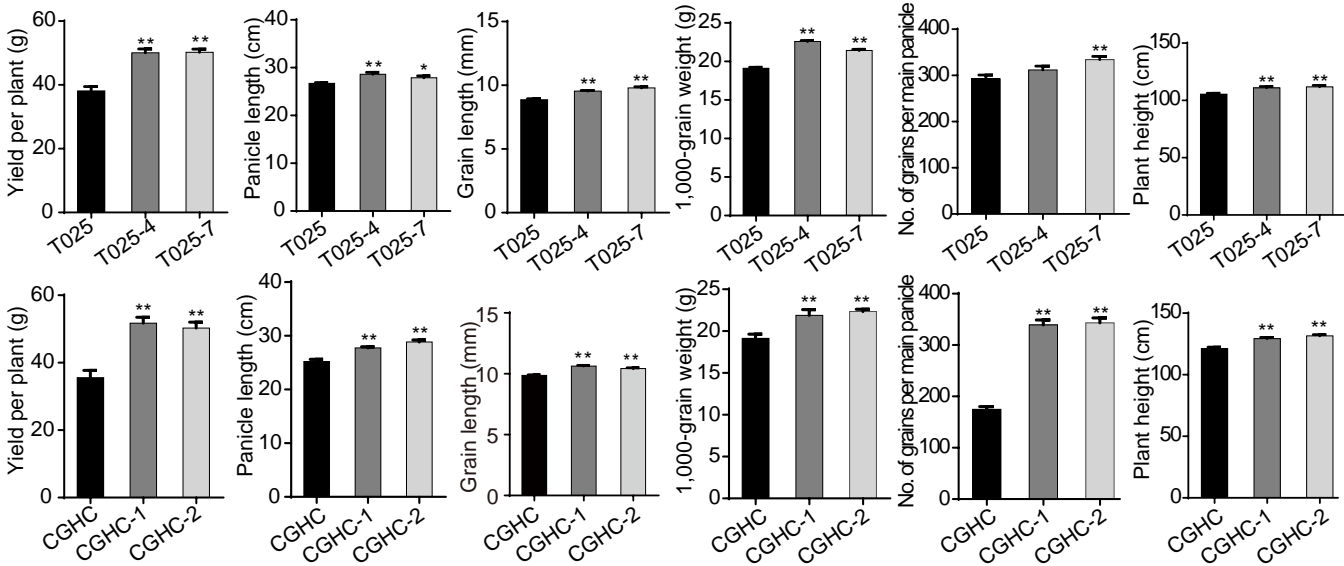

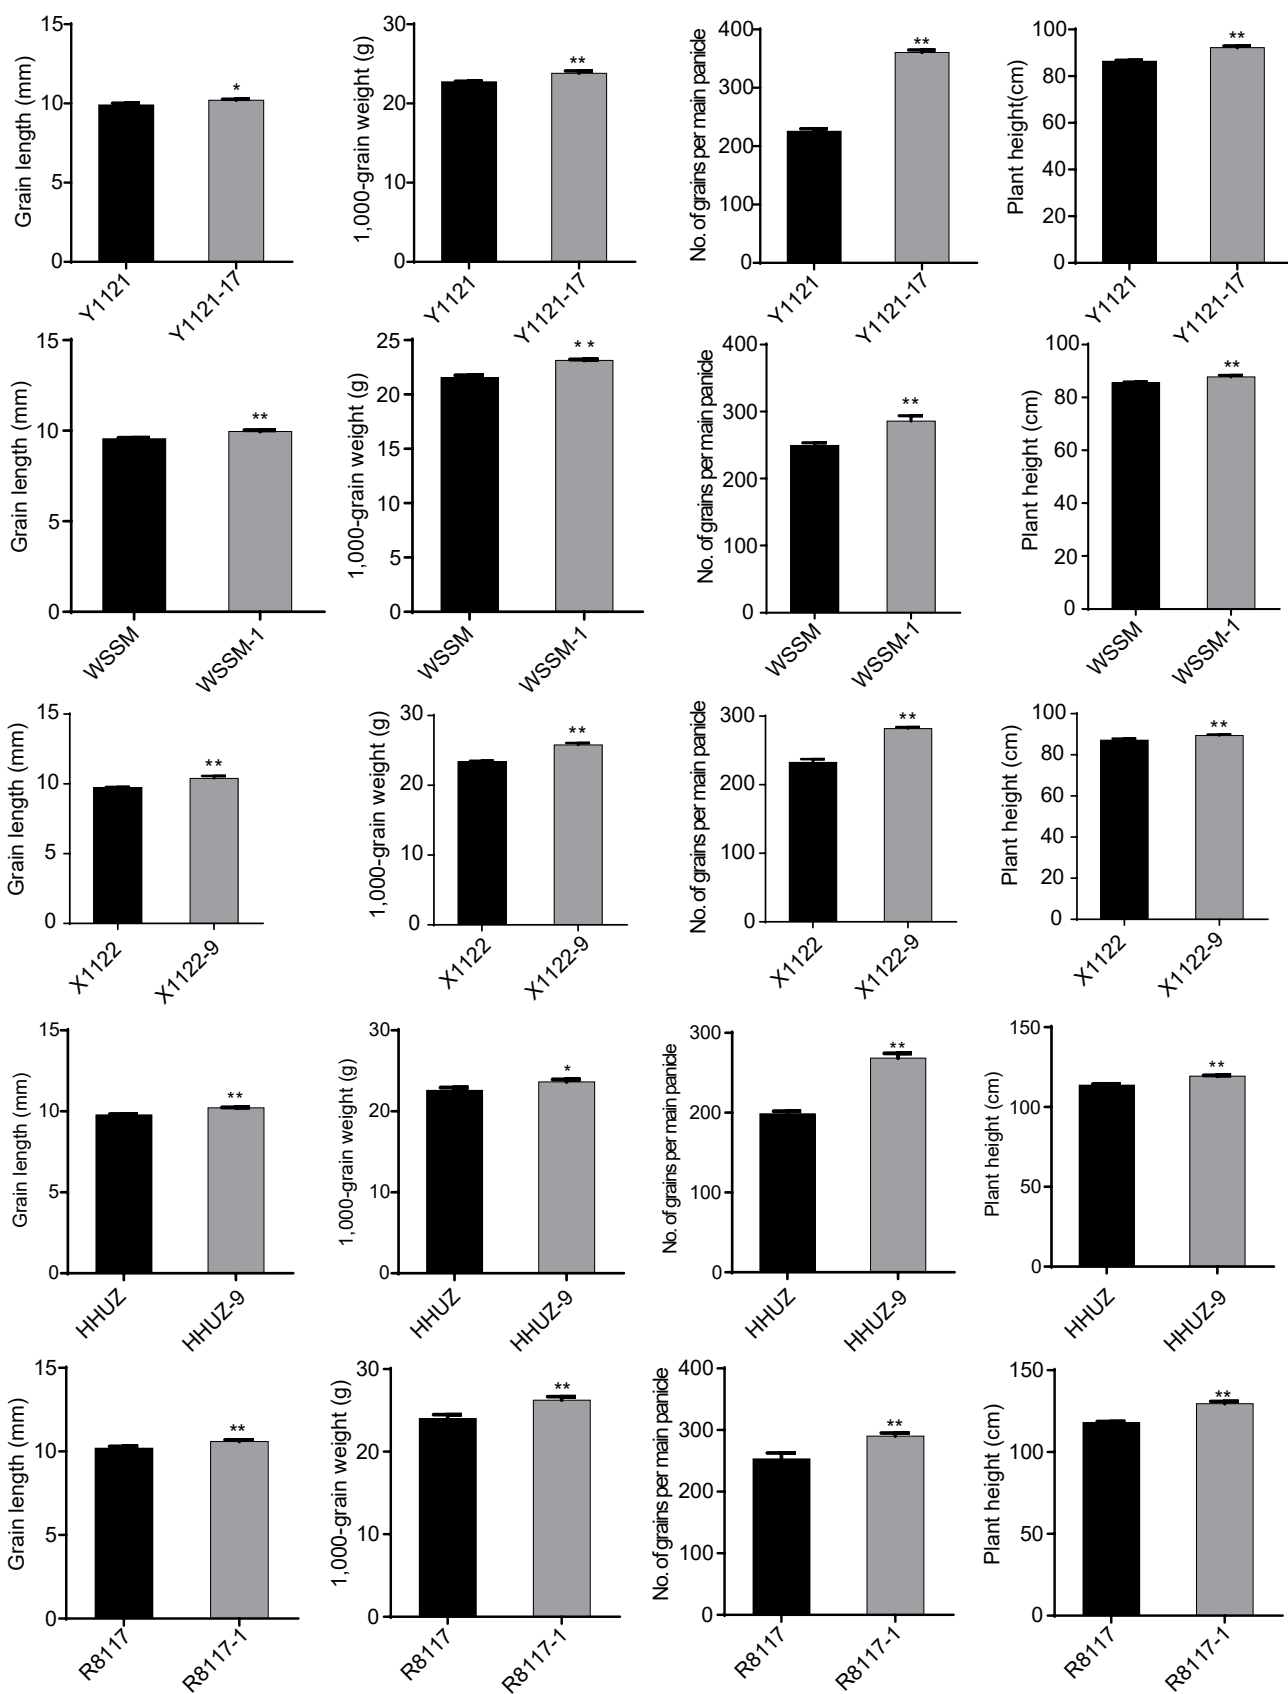

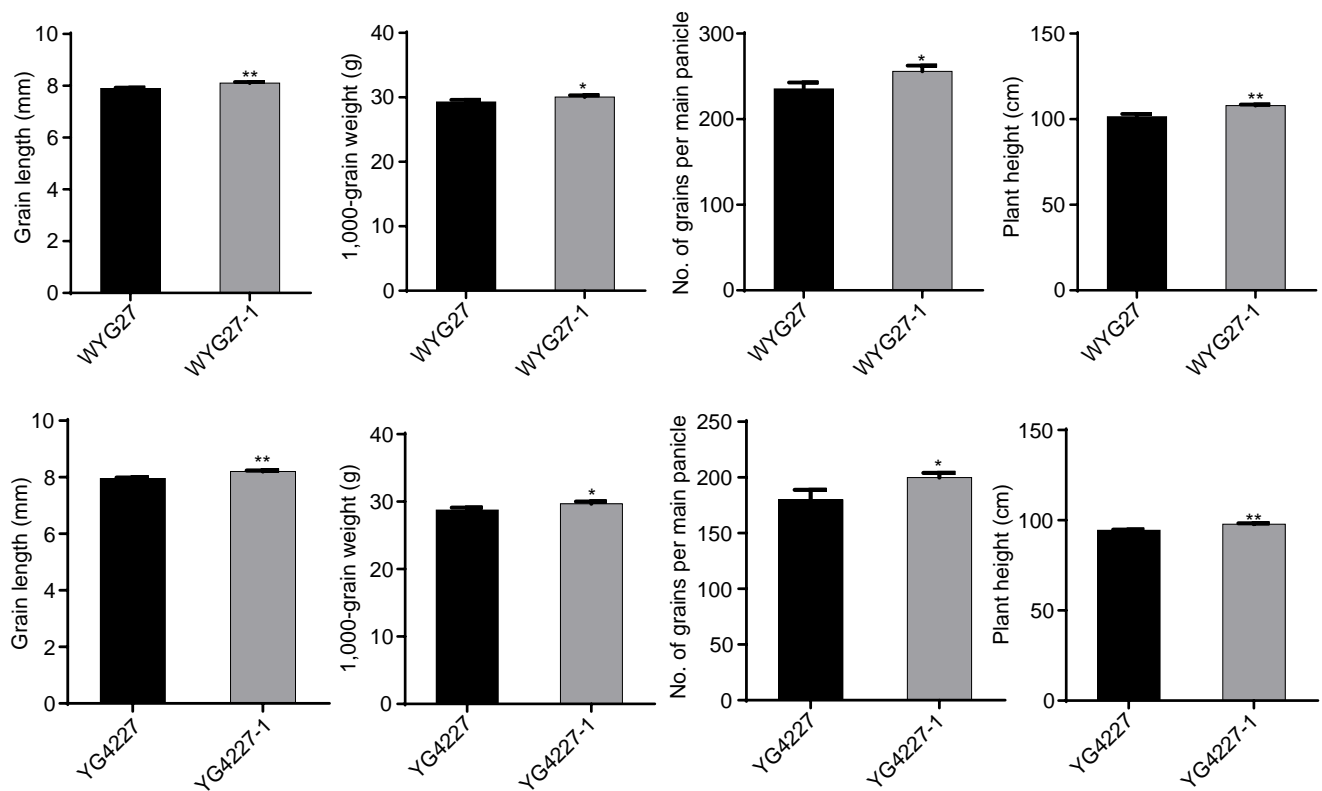

**Fig. S1.** Phenotypes of RNAi-*OsPDCD5*-RNAi lines (RP), *OsPDCD5* knockout lines and OE-*OsPDCD5* (transgenic line overexpressing *OsPDCD5*). (A) Plant architecture and panicles of Bing1B (wildtype) and RP-1 and RP-2 plants. RP-1 and RP-2 are individual plants of the same RNAi-*OsPDCD5* line. (B) Phenotypic traits of Bing1B and RP. (C) Scanning electron and light microscope photographs of the glume inner surfaces of mature seeds from wildtype and knockout lines CGHC, CGHC-1, GC122 and GC122-1. Scale bars are 50  $\mu$ m. (D) Cell density per square millimeter on the glume inner surfaces of CGHC, CGHC-1, GC122 and GC122-1. (E) Internode length of Bing1B and Bing1B-10. (F) Plant architecture and panicles of Nipponbare (wildtype) and OE-*OsPDCD5*-1 and OE-*OsPDCD5*-2 plants. (G) Phenotypic traits of Nipponbare and OE-*OsPDCD5*. OE-*OsPDCD5*-1 and OE-*OsPDCD5*-2 are individual plants of the same OE-*OsPDCD5* line. (H) Target site in the *OsPDCD5* sequence in *OsPDCD5* knockout line T025-7 and CGHC-2. Field state, plant architecture, panicles and grains of T025 (wildtype) and T025-7, CGHC (wildtype) and CGHC-2. Plant architecture and panicles of Y1121 (wildtype) and Y1121-17 (knockout), WSSM (wildtype) and WSSM-1 (knockout), X1122 (wildtype) and X1122-9 (knockout), HHUZ (wildtype) and HHUZ-9 (knockout), R8117 (wildtype) and R8117-1 (knockout), WYG27 (wildtype) and WYG27-1 (knockout), YG4227 (wildtype) and YG4227-1 (knockout). (I) Phenotypic traits of T025 and T025-7, CGHC and CGHC-2, Y1121 and Y1121-17, WSSM and WSSM-1, X1122 and X1122-9, HHUZ and HHUZ-9, R8117 and R8117-1, WYG27 and WYG27-1, YG4227 and YG4227-1. The data are the means  $\pm$  SEM (three replicates in D and E; over six replicates in B, G and I). \* $P < 0.05$ , \*\* $P < 0.01$  (Student's *t*-test).

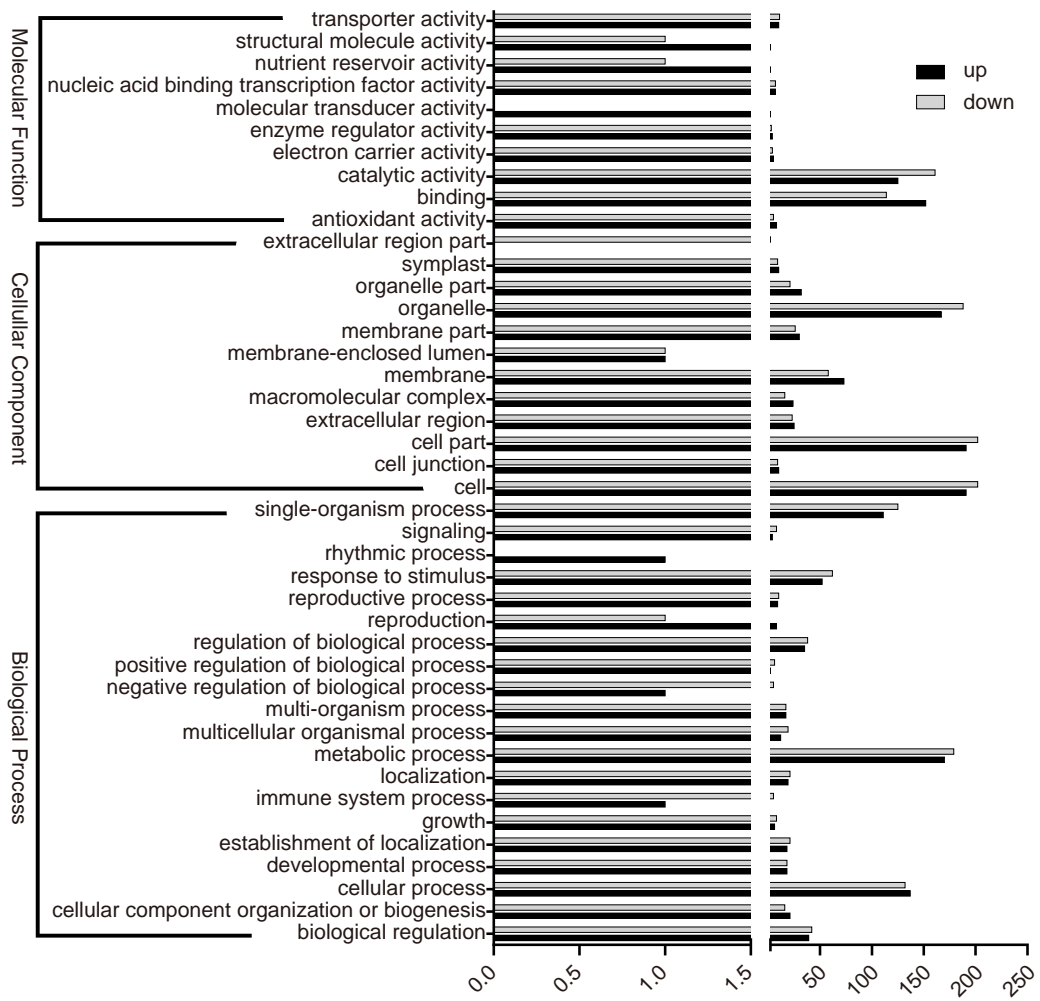

**Fig.S2.** GO functional enrichment analyzes of DEGs.

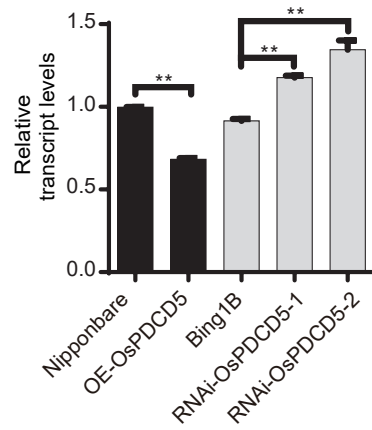

**Fig.S3.** Expression levels of *OsAGAP* in OE-*OsPDCD5* (transgenic line overexpressing *OsPDCD5*) and RNAi-*OsPDCD5* lines and the corresponding wildtypes Nipponbare and Bing1B by qPCR (three replicates). *Tubulin* was used as the loading control. The data are the means  $\pm$  SEM. \* $P < 0.05$ , \*\* $P < 0.01$  (Student's *t*-test).



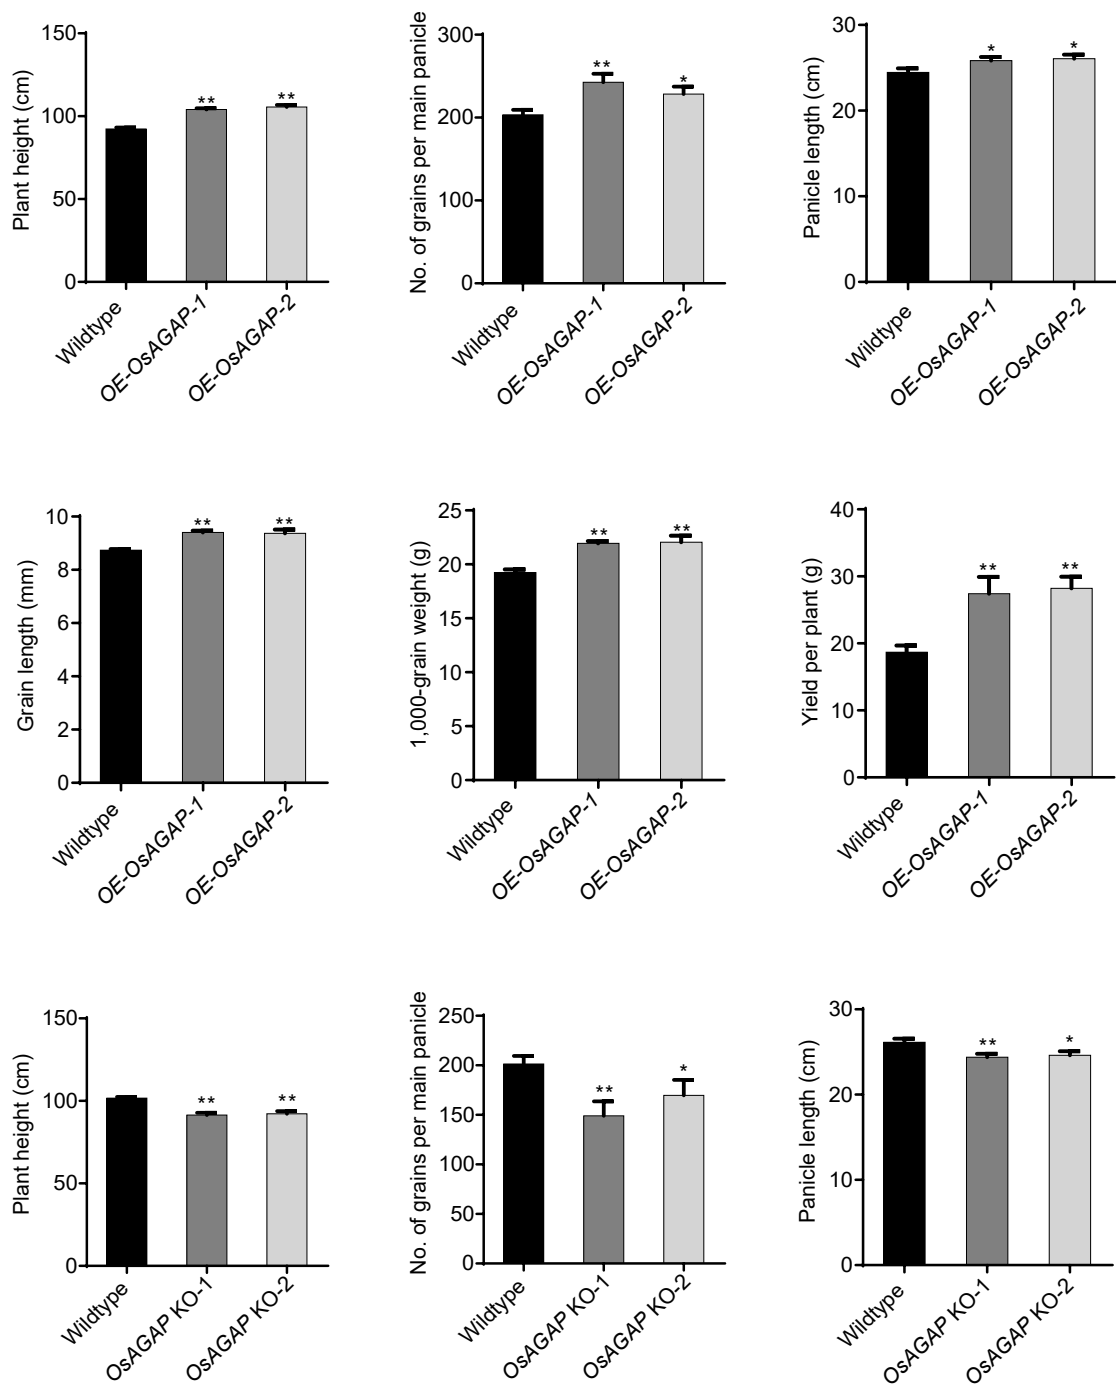

**Fig.S4.** Phenotypic traits of transgenic lines overexpressing *OsAGAP* (OE-*OsAGAP*-1 and OE-*OsAGAP*-2) and wildtype Bing1B (seven replicates). *OsAGAP* knockout lines (*OsAGAP* KO-1 and *OsAGAP* KO-2) and wildtype CGHC (over ten replicates). The data are the means  $\pm$  SEM. \* $P < 0.05$ , \*\* $P < 0.01$  (Student's *t*-test).

A

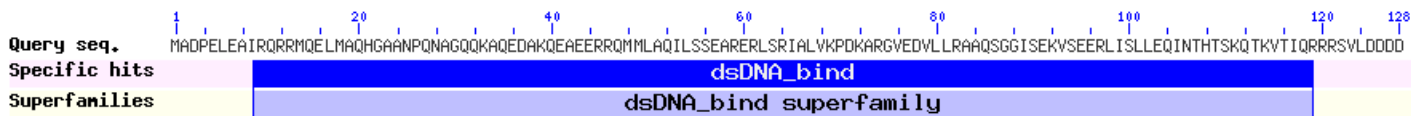

B

Tree scale: 1

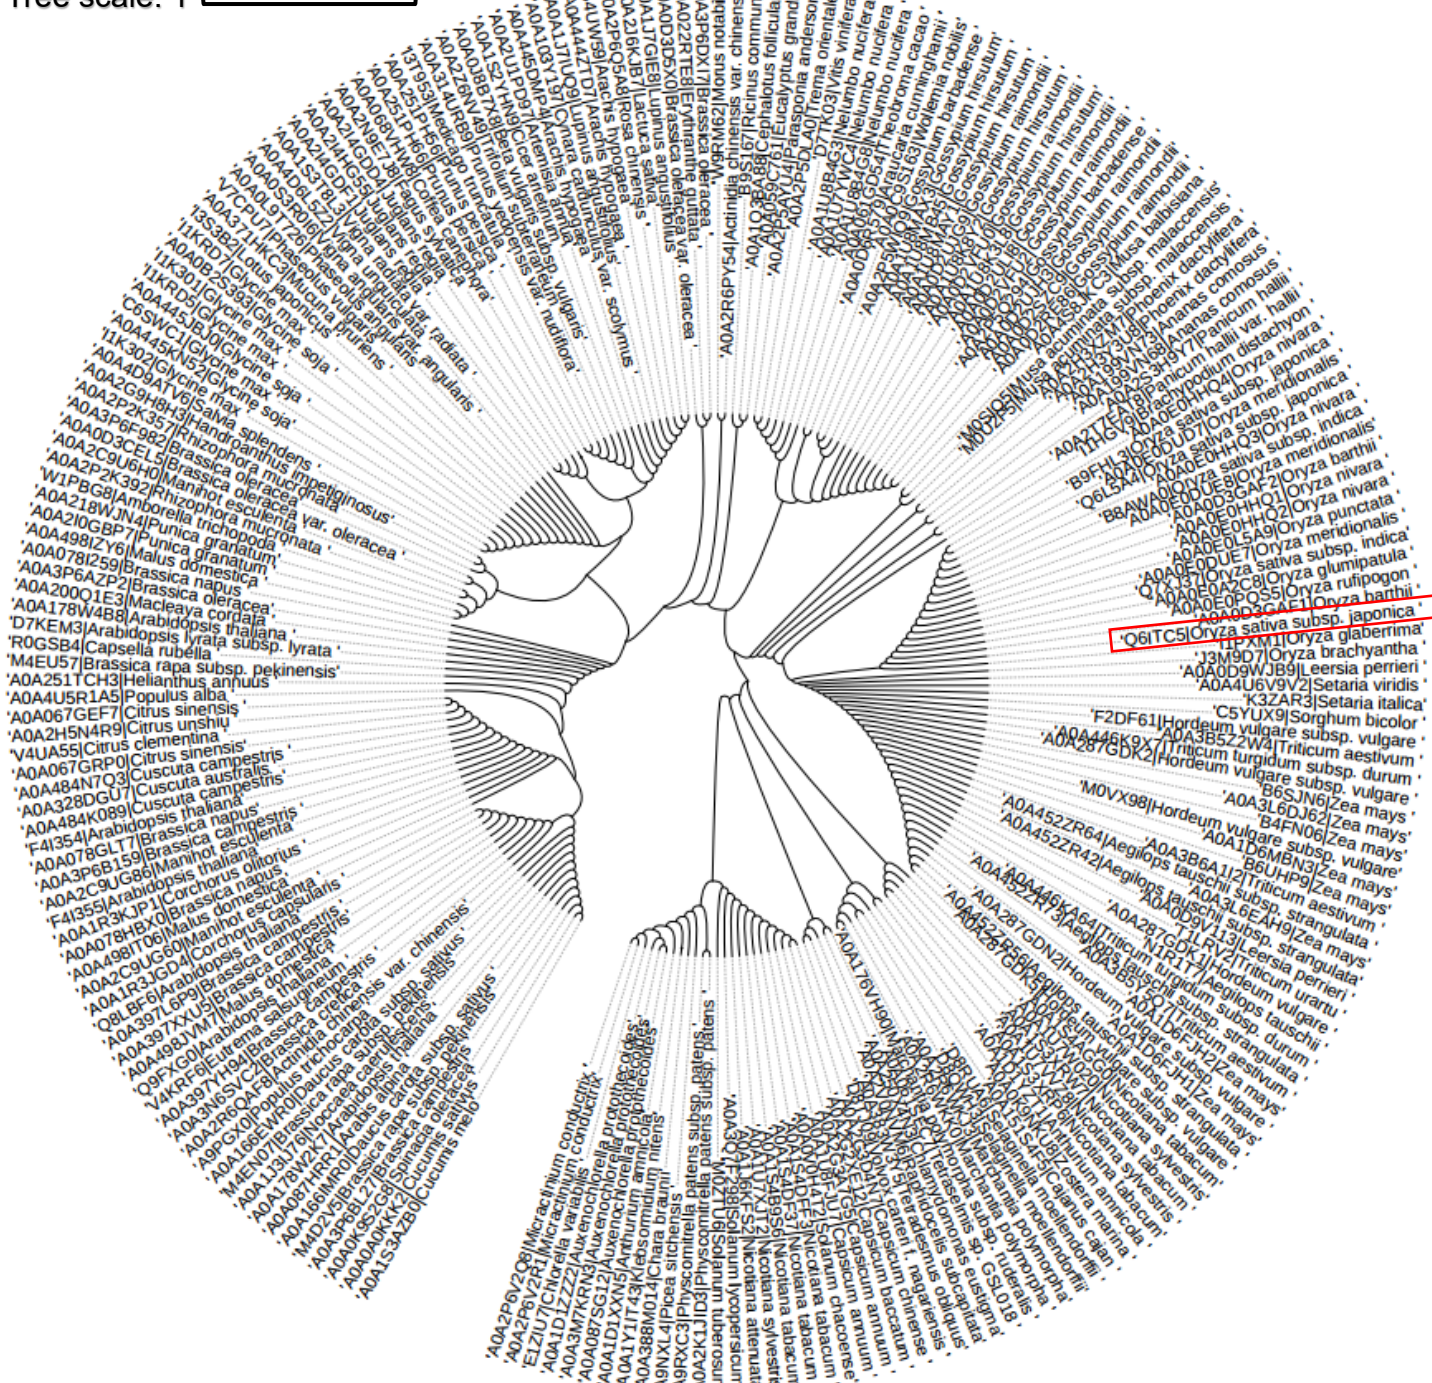

## Tree scale

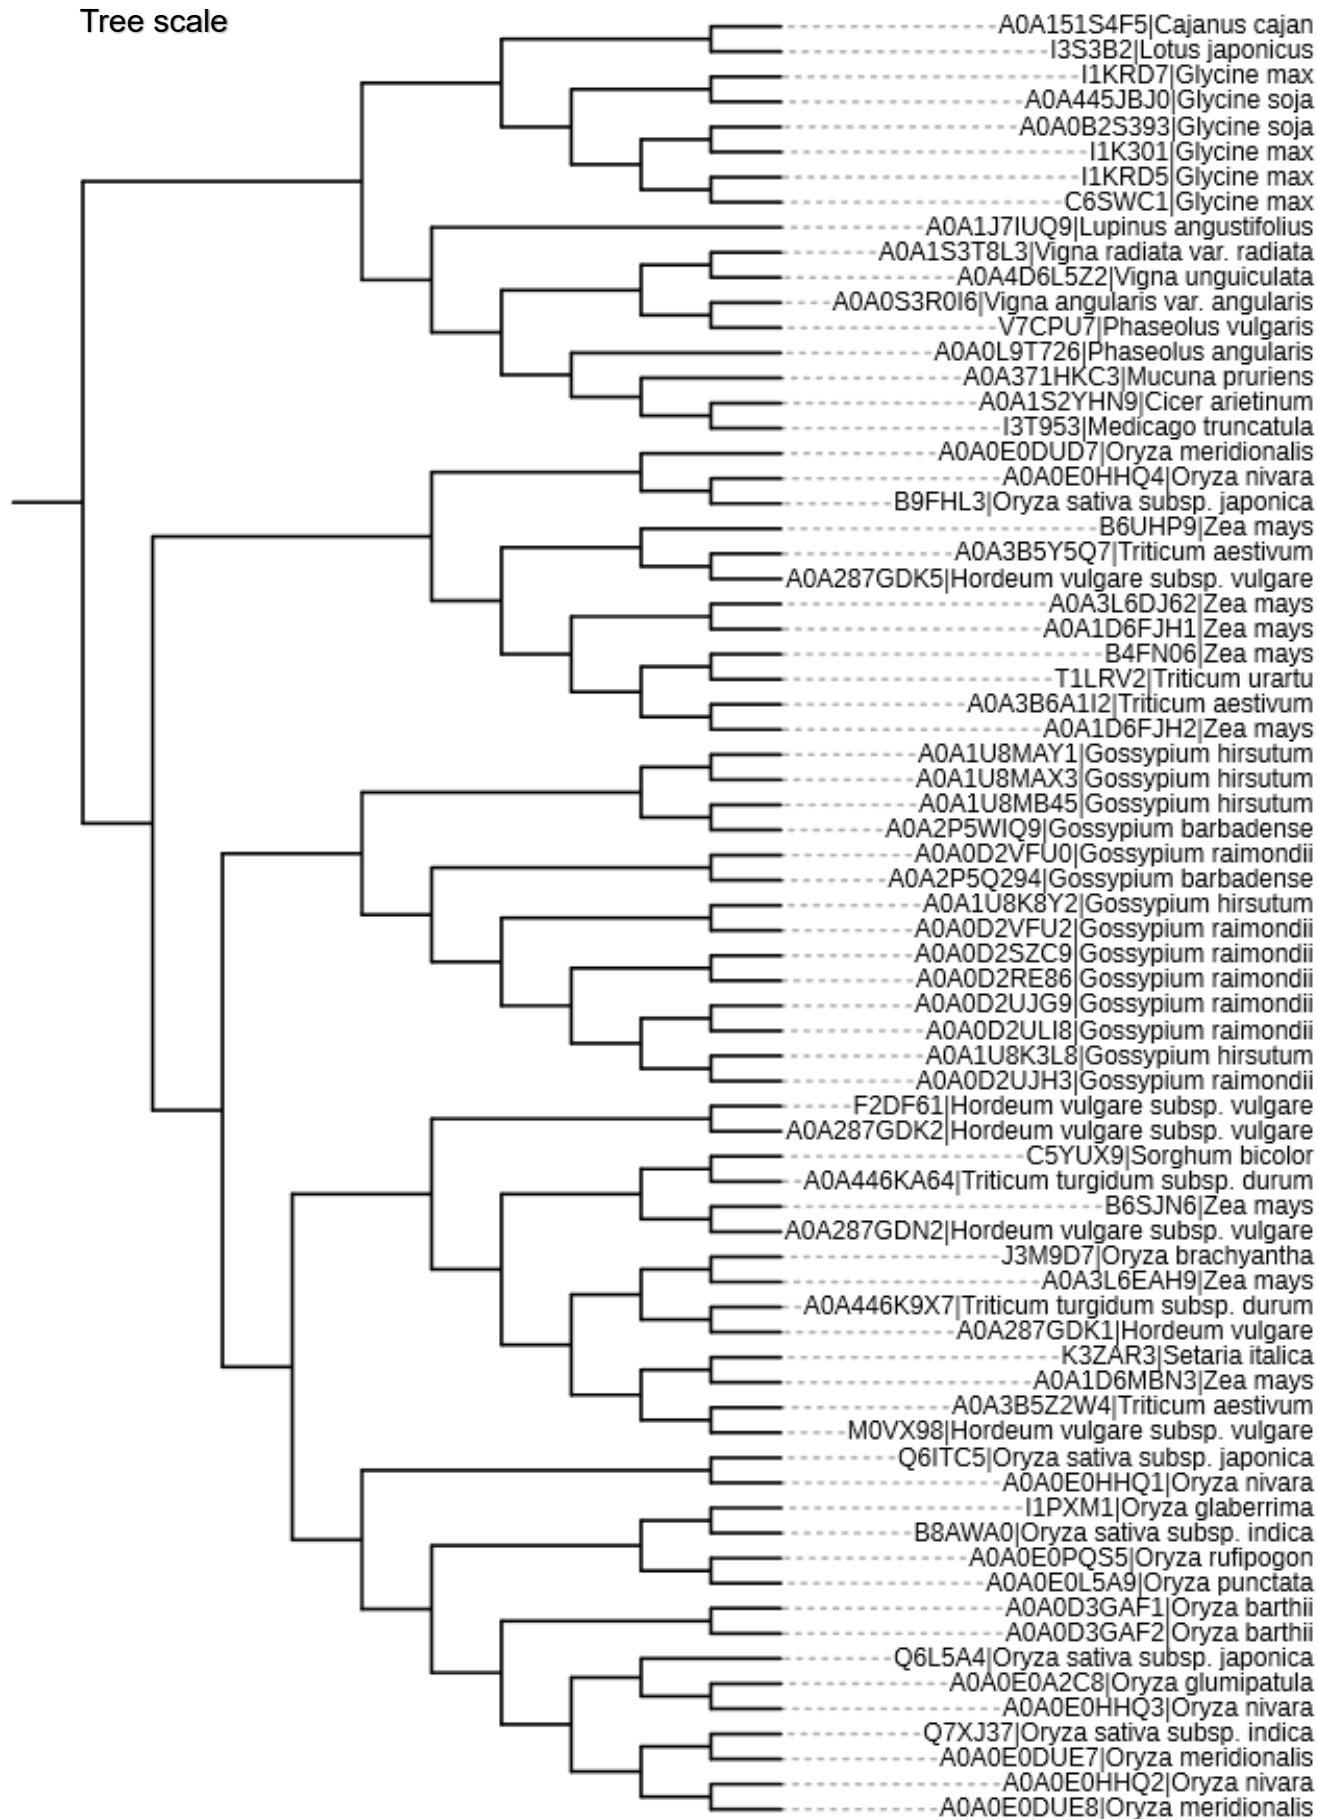

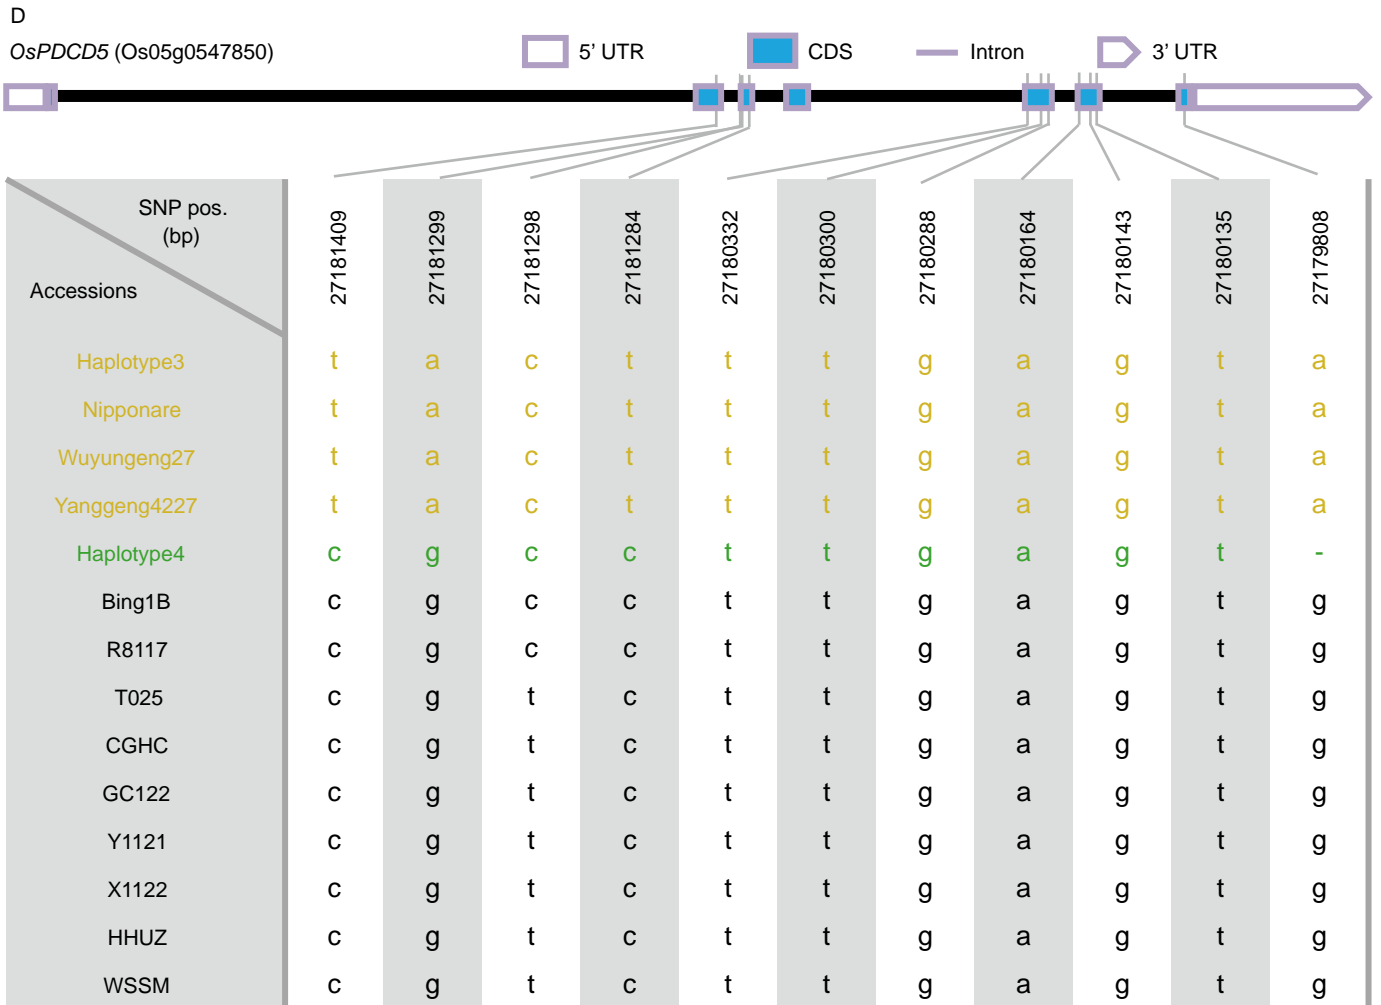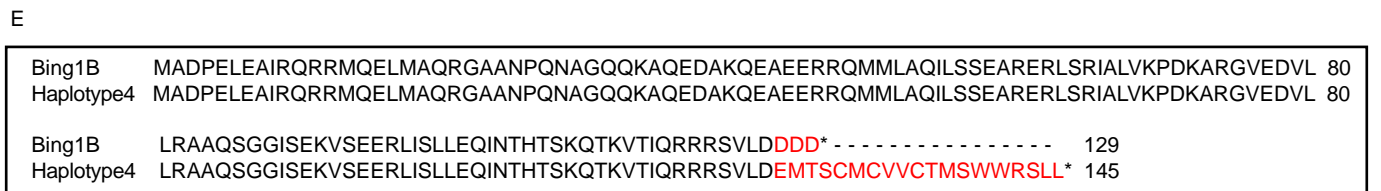

**Fig. S5.** *OsPDCD5* gene structure and conservation. (A) Predicted double-stranded DNA-binding domain of *OsPDCD5*. (B, C) *OsPDCD5* homologs are present in a large number of species (B) and in many common crops (C). *OsPDCD5* is marked by the red box. (D) Comparison of *OsPDCD5* haplotype3,4 and *OsPDCD5* in rice varieties edited in this study. (E) *OsPDCD5* protein alignment of Bing1B and Haplotype4 using the CLC sequence viewer7 multiple sequence alignment tool.

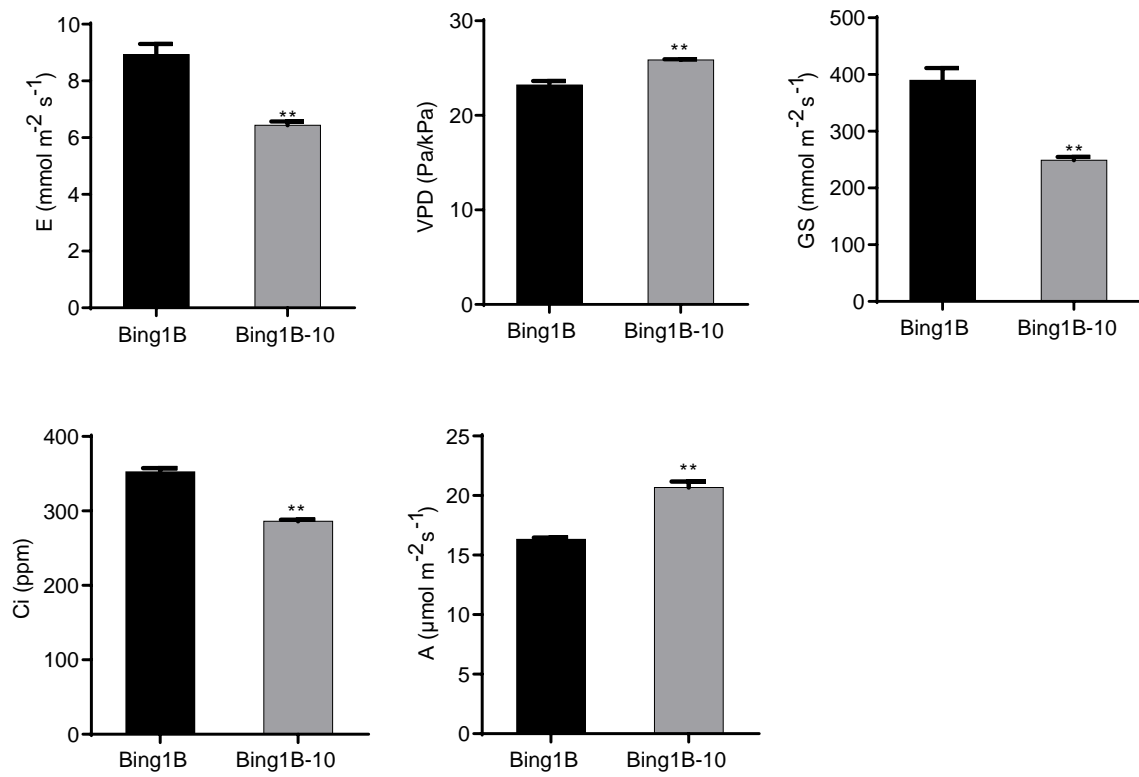

**Fig. S6.** Photosynthetic parameters of *OsPDCD5* knockout line Bing1B-10 and wildtype Bing1B at the tillering stage. E, transpiration rate; VPD, water pressure saturation deficit; GS, stomatal conductance; Ci, intercellular CO<sub>2</sub> concentration; A, net photosynthetic rate. The data are the means ± SEM (three replicates). \**P* < 0.05, \*\**P* < 0.01 (Student's *t*-test).

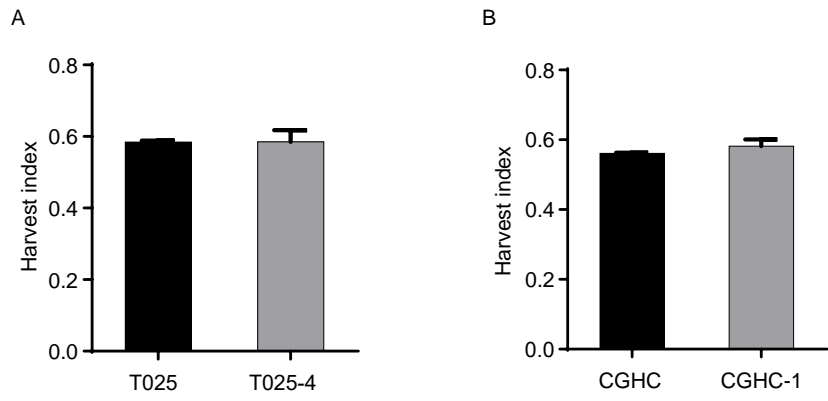

**Fig. S7.** Harvest index of *OsPDCD5* knockout lines. (A) Harvest index of T025 (wildtype) and T025-4 (knockout). (B) Harvest index of CGHC (wildtype) and CGHC-1 (knockout). (five replicates in A and B).

**Table. S1** Conservation of OsPDCD5 amino acid sequences among various plant species

| Entry name | Organism                                     | Identity | Score | E-value  |
|------------|----------------------------------------------|----------|-------|----------|
| I1PXM1     | <i>Oryza glaberrima</i>                      | 100.00%  | 611   | 8.00E-80 |
| A0A0D3GAF1 | <i>Oryza barthii</i>                         | 100.00%  | 611   | 1.20E-79 |
| B9FHL3     | <i>Oryza sativa</i> subsp. <i>japonica</i>   | 98.50%   | 317   | 1.3E-35  |
| Q7XJ37     | <i>Oryza sativa</i> subsp. <i>indica</i>     | 98.40%   | 605   | 6.80E-79 |
| K3ZAR3     | <i>Setaria italica</i>                       | 97.70%   | 601   | 2.80E-78 |
| J3M9D7     | <i>Oryza brachyantha</i>                     | 96.90%   | 599   | 5.80E-78 |
| C5YUX9     | <i>Sorghum bicolor</i>                       | 96.10%   | 590   | 1.30E-76 |
| A0A287GDK5 | <i>Hordeum vulgare</i> subsp. <i>vulgare</i> | 95.50%   | 312   | 6.10E-35 |
| A0A3B6A1I2 | <i>Triticum aestivum</i>                     | 93.70%   | 556   | 2.10E-71 |
| B6SJN6     | <i>Zea mays</i>                              | 93.00%   | 564   | 1.10E-72 |
| A0A0D2UJG9 | <i>Gossypium raimondii</i>                   | 86.70%   | 537   | 1.60E-68 |
| A0A1S3T8L3 | <i>Vigna radiata</i> var. <i>radiata</i>     | 82.80%   | 520   | 6.20E-66 |
| A0A151S4F5 | <i>Cajanus cajan</i>                         | 79.50%   | 503   | 2.50E-63 |
| .....      | .....                                        | .....    | ..... | .....    |
| I3S3B2     | <i>Lotus japonicus</i>                       | 77.30%   | 489   | 3.40E-61 |

**Table. S2** Primers used to confirm knockout mutants

| Name            | Primers (5'-3')             | Gene Name      |
|-----------------|-----------------------------|----------------|
| OsU6-JC-S       | CCTGGCTGTATTTGGTGGTT        | <i>OsU6</i>    |
| OsU6-JC-A       | AGTTAGCTGGGCAATGTGGT        | <i>OsU6</i>    |
| Cas9-OsU6-F     | GATGTGCAGTCAGGGACCAT        | <i>Cas9</i>    |
| Cas9-RNAi-R     | GACTCGGTGCCACTTTTTCA        | <i>Cas9</i>    |
| PCD-Exon2,3,4-F | ACCATGTAAC TTCTCCTGATGGAAC  | <i>OsPDCD5</i> |
| PCD-Exon2,3,4-R | GTTCAACAAAAATGACATCAAC      | <i>OsPDCD5</i> |
| hyg (280)+      | ACGGTGTCTCCATCACAGTTTGCC    | <i>hygr</i>    |
| hyg (280)-      | TTCCGGAAGTGCTTGACATTGGGGA   | <i>hygr</i>    |
| Kana (270)+     | CGGCTATGACTGGGCACAACAGACAAT | <i>Kana</i>    |
| Kana (270)-     | CTCGGCAGGAGCAAGGTGAGATGAC   | <i>Kana</i>    |
| 35S-CX-S        | ATCCTTCGCAAGACCCTTCCTC      |                |



**Table. S3** List of rice cultivars used in this study

| Type                 | Original producing area | Name on paper | Full name       | Corresponding transgenic lines                                                    |
|----------------------|-------------------------|---------------|-----------------|-----------------------------------------------------------------------------------|
| <i>Xian/Indica</i>   | China                   | Bing1B        | Bing1B          | Bing1B-10 (knockout line),<br>RP-1, RP-2 (RNAi lines)                             |
| <i>Xian/Indica</i>   | China                   | T025          | Changhui T025   | T025-1, T025-4, T025-7,<br>T025-8, T025-10 (knockout lines)                       |
| <i>Xian/Indica</i>   | China                   | CGHC          | Changguihuicang | CGHC-1, CGHC-2 (knockout lines)                                                   |
| <i>Xian/Indica</i>   | China                   | Y1121         | Yeyue1121       | Y1121-17 (knockout line)                                                          |
| <i>Xian/Indica</i>   | China                   | WSSM          | Wushansimiao    | WSSM-1(knockout line)                                                             |
| <i>Xian/Indica</i>   | China                   | X1122         | Xin1121         | X1122-9 (knockout line)                                                           |
| <i>Xian/Indica</i>   | China                   | GC122         | Guangchao122    | GC122-1, GC122-2 (knockout lines)                                                 |
| <i>Xian/Indica</i>   | China                   | HHUZ          | Huanghuazhan    | HHUZ-9 (knockout line)                                                            |
| <i>Xian/Indica</i>   | China                   | R8117         | R8117           | R8117-1 (knockout line)                                                           |
| <i>Geng/japonica</i> | Japan                   | Nipponbare    | Nipponbare      | OE- <i>OsPDCD5-1</i> , OE- <i>OsPDCD5-2</i><br>(over-expression transgenic lines) |
| <i>Geng/japonica</i> | China                   | YG4227        | YangGeng4227    | YG4227-1(knockout line)                                                           |
| <i>Geng/japonica</i> | China                   | WYG27         | WuYuGeng27      | WYG27-1(knockout line)                                                            |

**Table. S4** Primers used to construct vectors

| Name            | Primers (5'-3')                  | Gene Name      |
|-----------------|----------------------------------|----------------|
| pPCD-5-Sall     | GGgtcgacAGAAGAAGATGGAACAATAG     | <i>OsPDCD5</i> |
| pPCD-3-BglII    | ATAagatctACCATGGCTTCCCCGCGCGCTCA | <i>OsPDCD5</i> |
| PCD-GFP-NcoI    | TATccatggATGGCTGACCCAGAGTTGG     | <i>OsPDCD5</i> |
| PCD-GFP-SpeI    | GGactagtGTCATCGTCGTCAAGGACGC     | <i>OsPDCD5</i> |
| PCD-GFPC-EcoRI  | TATgaattcATGGCTGACCCAGAGTTGG     | <i>OsPDCD5</i> |
| PCD-GFPC-KpnI   | GGggtaccGGTCATCGTCGTCAAGGACGC    | <i>OsPDCD5</i> |
| PCD-RNAi5-BamHI | CGg gatccATGGCTGACCCAGAGTTGG     | <i>OsPDCD5</i> |
| PCD-RNAi5-KpnI  | GGggtaccCTAGTCATCGTCGTCAAGGAC    | <i>OsPDCD5</i> |
| PCD-RNAi3-SpeI  | GGactagtCTAGTCATCGTCGTCAAGGAC    | <i>OsPDCD5</i> |
| PCD-RNAi3-SacI  | GGgagctcATGGCTGACCCAGAGTTGG      | <i>OsPDCD5</i> |
| PCD-GFPN-EcoRI  | TATgaattcTATGGCTGACCCAGAGTTGG    | <i>OsPDCD5</i> |
| PCD-GFPN-KpnI   | GGggtaccCTAGTCATCGTCGTCAAGGA     | <i>OsPDCD5</i> |
| M13R            | CAGGAAACAGCTATGACC               |                |
| M13F            | TGTAAAACGACGGCCAGT               |                |
| NGFP-Sequence   | ATGGTCCGGACTCAGATCTCGA           | <i>GFP</i>     |
| GFPC-Sequence   | CCATGGGCACTAGTATGGTC             | <i>GFP</i>     |

**Table. S5** Primers used for the qPCRs

| Name        | Primers (5'-3')           | Gene Name             |
|-------------|---------------------------|-----------------------|
| Actin-F     | TCTGGCATCACACCTTCTACA     | <i>Actin</i>          |
| Actin-R     | GGAAGGCTGGAAGAGGAC        | <i>Actin</i>          |
| Tubulin-F   | TACCGTGCCCTTACTGTTC       | <i>Tubulin</i>        |
| Tubulin-R   | CGGTGGAATGTCACAGACAC      | <i>Tubulin</i>        |
| OsPDCD5-S2  | CTGAGGAACGGCGGCAGATGAT    | <i>OsPDCD5</i>        |
| OsPDCD5-A2  | GGTATTGATTTGCTCCAGAAGTG   | <i>OsPDCD5</i>        |
| OsAGAP-F    | GAAGGAGCTATTGCACAG        | <i>OsAGAP</i>         |
| OsAGAP-R    | CATATATAGCATTGGCGTG       | <i>OsAGAP</i>         |
| OsEXPA1-F   | ACATGCCTCCTCTGGAAC        | <i>OsEXPA1</i>        |
| OsEXPA1-R   | GTACATCACCGGCACGAT        | <i>OsEXPA1</i>        |
| OsEXPA5-F   | CTTGATCACCCGCCAAAAT       | <i>OsEXPA5</i>        |
| OsEXPA5-R   | TAAGCAGCACACAGGGCATA      | <i>OsEXPA5</i>        |
| OsEXPA10-F  | GAACACCTTTGGAGCCAT        | <i>OsEXPA10</i>       |
| OsEXPA10-R  | ATCTTCTCGAAGGACTGGAT      | <i>OsEXPA10</i>       |
| OsEXPA16-F  | GTGAAGGTGAAAGGGTCGAG      | <i>OsEXPA16</i>       |
| OsEXPA16-R  | CAAGAATGACACCCACATCG      | <i>OsEXPA16</i>       |
| 06g47360-F  | CACCTTCTACACCGTTTACAC     | <i>LOC_Os06g47360</i> |
| 06g47360-R  | GTCGACGATCTTGACGGTGAC     | <i>LOC_Os06g47360</i> |
| 08g37930-F  | CATCTGGAGTCGCCACCTTCTACAC | <i>LOC_Os08g37930</i> |
| 08g37930-R  | GTTGTCGACCATCTTCACGGTGAC  | <i>LOC_Os08g37930</i> |
| 06g03970-F  | ATATTGCTCTGCGTTCTGCTG     | <i>LOC_Os06g03970</i> |
| 06g03970-R  | ACAAGTGGCTGTGGTTGATTTG    | <i>LOC_Os06g03970</i> |
| OsGA20ox1-S | TACGCCAGCAGCTTCACGG       | <i>OsGA20ox1</i>      |
| OsGA20ox1-A | TCCATCAGCTCCAGCGACA       | <i>OsGA20ox1</i>      |
| OsGA20ox3-S | CGCTCACCTTCTTCTCAACC      | <i>OsGA20ox3</i>      |
| OsGA20ox3-A | AGCCATTCTTTGCTTGATCCA     | <i>OsGA20ox3</i>      |
| OsGA2ox3-S  | TCGTTGCAGGTTCTGACCA       | <i>OsGA2ox3</i>       |
| OsGA2ox3-A  | CCTGTTGTCTCCAAGCCTT       | <i>OsGA2ox3</i>       |
| OsGA2ox4-S  | CTCCTTCTCGTCATCGTC        | <i>OsGA2ox4</i>       |
| OsGA2ox4-A  | GCAGCCTTCTTGTACTCCC       | <i>OsGA2ox4</i>       |
| OsGA2ox5-S  | CCAGCACCTCATCGTCA         | <i>OsGA2ox5</i>       |
| OsGA2ox5-A  | TGCTTCTGTACTCGCCGAA       | <i>OsGA2ox5</i>       |
| OsGA2ox6-S  | GACTTCTCACCGTCTG          | <i>OsGA2ox6</i>       |
| OsGA2ox6-A  | GCACCTTCTTCTGTACTCC       | <i>OsGA2ox6</i>       |
| OsGA3ox1-S  | GATCTTCCATGTGCTCACC       | <i>OsGA3ox1</i>       |
| OsGA3ox1-A  | GAATCATGCTCAACGCCGAT      | <i>OsGA3ox1</i>       |

| Name       | Primers (5'-3')           | Gene Name |
|------------|---------------------------|-----------|
| OsGA3ox2-S | TCCAAGCTCATGTGGTCCGA      | OsGA3ox2  |
| OsGA3ox2-A | TCCTCTCCGCCTCGACTC        | OsGA3ox2  |
| EUI-F2     | CTTCTCCTTCGATGTGATATCGC   | OsEUI     |
| EUI-R2     | ACGCTGGTCTCCGACATGAG      | OsEUI     |
| OsGID1-F2  | CAAGAGCCTCATCATCGTGT      | OsGID1    |
| OsGID1-R2  | CATTGGACAACCTTGACGTG      | OsGID1    |
| OsGID2-F2  | CTATCTCAGAGCTGGACACT      | OsGID2    |
| OsGID2-R2  | CCTCCTGTTTCCGACAAATC      | OsGID2    |
| OsSPY-F    | ATCGTCCTCTGGTCATTGGC      | OsSPY     |
| OsSPY-R    | TCTTTACCAAGCTAGCAACC      | OsSPY     |
| SLR1-F1    | GACGTCAACGAACGCTCAATT     | OsSLR1    |
| SLR1-R1    | CGGAGTCCAGTCGTGATCT       | OsSLR1    |
| OsYUC3-F   | CTGGTGACATCAAGGTACGG      | OsYUC3    |
| OsYUC3-R   | ACTCCCGTCTTTAACCAG        | OsYUC3    |
| OsYUC9-F   | CTGGCTCAAGAGTGATGACG      | OsYUC9    |
| OsYUC9-R   | TCCTCGTAGCTGCCGTAGAT      | OsYUC9    |
| OsTAR2-F   | CGCCCTACTACTCGTCATACC     | OsTAR2    |
| OsTAR2-R   | GATTGTTCCGGGAGCAGAC       | OsTAR2    |
| OsIPT9-F   | ACACCCGAACAACCATCGAA      | OsIPT9    |
| OsIPT9-R   | GTCGACCCCACTTCTCTGTG      | OsIPT9    |
| OsIPT10-F  | CTGCCTTCTCCTTGCCCTAC      | OsIPT10   |
| OsIPT10-R  | CAGCATCTCTTCGCACCTCA      | OsIPT10   |
| LOG-F      | CGGTTTGCTGATGCGTTCAT      | OsLOG     |
| LOG-R      | TCGCTGACAGCCATGTCAAT      | OsLOG     |
| OsCKX4-F   | GACCGACTACCTCCATCTCACA    | OsCKX4    |
| OsCKX4-R   | GGTTGACATTGCTGACCTGC      | OsCKX4    |
| OsRR9/10-F | TCATGAGGACAGCCCAATTTCTA   | OsRR9/10  |
| OsRR9/10-R | TGCAGTAGTCTGTGATGATCAGGTT | OsRR9/10  |
| OHK4-F     | CAAGAACATATTGGTAGTTG      | OsOHK4    |
| OHK4-R     | CCTTCCCTTCCATTGCTCGT      | OsOHK4    |
| OsAHP1-F   | CAGAGATGGGTGCCTCAAGAC     | OsAHP1    |
| OsAHP1-R   | CGCGCCAGTTTAATGTTTAGG     | OsAHP1    |
| OsAHP2-F   | GCGCAACAAGTTTCAGACTATGC   | OsAHP2    |
| OsAHP2-R   | GATCACATGCAGCTACACTCTTTTG | OsAHP2    |
| OHK2-F     | AGGGATGCTCCAAATGCTCA      | OsOHK2    |
| OHK2-R     | AGATCAAAGGGCACCGTCTC      | OsOHK2    |

| Name       | Primers (5'-3')      | Gene Name      |
|------------|----------------------|----------------|
| OHK3b-RT-F | CCTGCTTCTTGGTGTCTTAG | <i>OsOHK3b</i> |
| OHK3b-RT-R | AGCATCCTAGCTCTCATCA  | <i>OsOHK3b</i> |
